# Supplementary material
Source: PubMed Central journal article supplement (PMC6484828)
Supplement: NIHMS1012787-supplement-1.pdf [file NIHMS1012787-supplement-1.pdf]

# Supporting Information

## High Density Lipoprotein-Mimicking Nanodiscs for Chemo-Immunotherapy against Glioblastoma Multiforme.

*Padma Kadiyala,<sup>1,2, #</sup> Dan Li,<sup>3,4, #</sup> Fernando M. Nuñez,<sup>1,2</sup> David Altshuler,<sup>1</sup> Robert Doherty,<sup>1,2</sup> Rui Kuai,<sup>3,4</sup> Minzhi Yu,<sup>3,4</sup> Neha Kamran,<sup>1,2</sup> Marta Edwards,<sup>1</sup> James J. Moon,<sup>3,4,5</sup> Pedro R. Lowenstein,<sup>1,2</sup> Maria G. Castro,<sup>1,2, 6, \*</sup> Anna Schwendeman<sup>3,4,6, \*</sup>*

### Affiliations:

<sup>1</sup> Department of Neurosurgery

<sup>2</sup> Department of Cell and Developmental Biology, University of Michigan Medical School, Ann Arbor, MI 48109, USA

<sup>3</sup> Department of Pharmaceutical Sciences

<sup>4</sup> Biointerfaces Institute

<sup>5</sup> Department of Biomedical Engineering, University of Michigan, Ann Arbor, MI 48109, USA

<sup>6</sup> Lead Contacts

<sup>#</sup> Joint First Authors

### \*Corresponding Authors:

\*Email: [annaschw@med.umich.edu](mailto:annaschw@med.umich.edu) or [mariacas@med.umich.edu](mailto:mariacas@med.umich.edu)

**1 Supplementary Table**

**4 Supplementary Figures**

**Supplemental Table 1:** Characterization Summary of different 22A sHDL-mimicking Nanodiscs.

| Group | Formulations (weight ratio)         | RT <sup>a</sup> (min) | Particle Size (nm) | PDI <sup>b</sup> | Purity |
|-------|-------------------------------------|-----------------------|--------------------|------------------|--------|
| A     | 22A: DMPC: POPC: PTX (1:1:1:0.06)   | 7.6                   | 12.1 $\pm$ 0.3     | 0.07 $\pm$ 0.01  | 99.2%  |
| B     | 22A: DMPC: POPC:DTX (1:1:1:0.06)    | 7.5                   | 11.2 $\pm$ 0.4     | 0.15 $\pm$ 0.01  | 99.2%  |
| C     | 22A: DMPC: POPC: CCNU (1:1:1:0.06)  | 7.4                   | 10.3 $\pm$ 0.1     | 0.05 $\pm$ 0.02  | 98.5%  |
| D     | 22A: SM (1:2)                       | 7.9                   | 9.5 $\pm$ 0.4      | 0.11 $\pm$ 0.01  | 99.0%  |
| E     | 22A SM: DTX (1:2:0.05)              | 7.9                   | 9.9 $\pm$ 0.1      | 0.07 $\pm$ 0.01  | 97.6%  |
| F     | 22A: SM: DTX (1:2:0.1)              | 7.9                   | 9.4 $\pm$ 0.2      | 0.13 $\pm$ 0.06  | 97.2%  |
| G     | 22A: DPPC: DTX (1:1:0.1)            | 7.8                   | 8.9 $\pm$ 0.1      | 0.15 $\pm$ 0.01  | 97.3%  |
| H     | 22A: DPPC: SM: DTX (1:1:1:0.1)      | 7.8                   | 9.4 $\pm$ 0.1      | 0.14 $\pm$ 0.01  | 98.0%  |
| I     | 22A: DMPC: POPC: DTX (1:1:1:0.1)    | 7.4                   | 11.1 $\pm$ 0.2     | 0.14 $\pm$ 0.02  | 99.7%  |
| J     | 22A: SM: DTX: CpG (1:2:0.05:0.0075) | 8.1                   | 8.6 $\pm$ 0.1      | 0.13 $\pm$ 0.02  | 97.9%  |

**A****CCNU**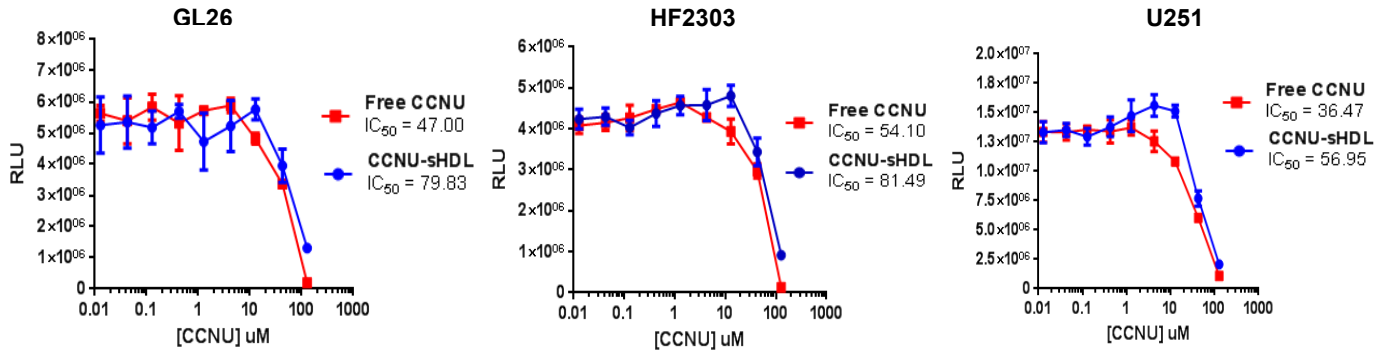**B****PTX**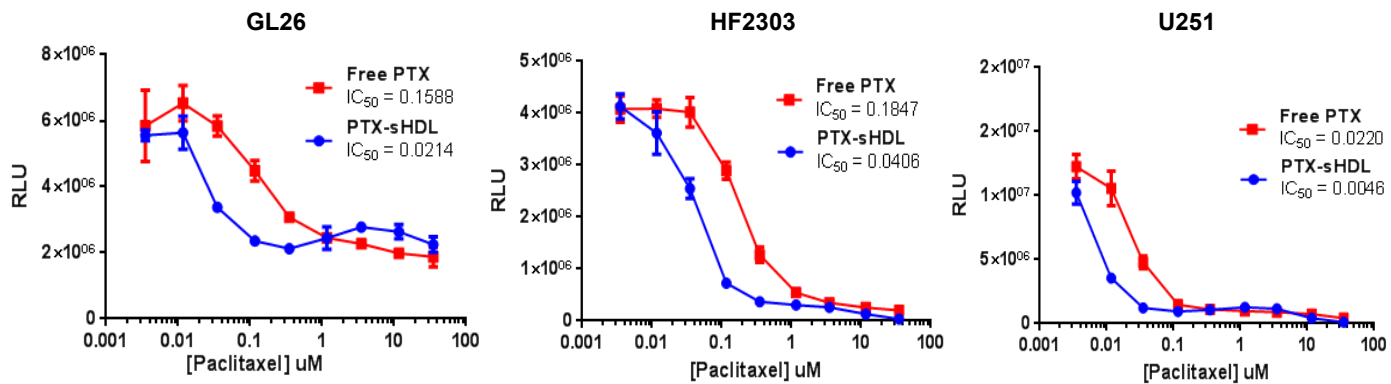

**Supplemental Figure 1: Cytotoxicity of chemotherapeutic loaded HDL-mimicking nanodiscs.**

**(A-B)** Dose response curves for mouse (GL26) and human (HF2303, U251) glioma cells treated with free (Panel A) CCNU, (Panel B) PTX; HDLs loaded with CCNU, PTX; or empty HDLs of equivalent HDL concentration to the chemotherapeutic loaded-HDLs. Cells were incubated for 48 hours at indicated doses, then cell viability was evaluated. Bars represent  $\pm$  SEM corresponding to three technical replicates.

## A

**GL26-wt tumor Cells Implantation in CD8 Knockout Mice**

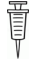 : Represents Treatment

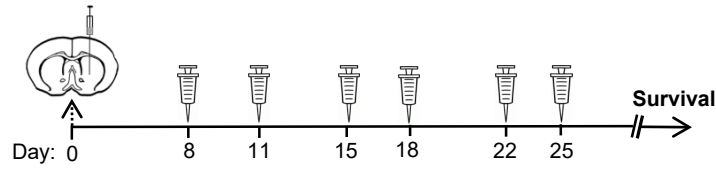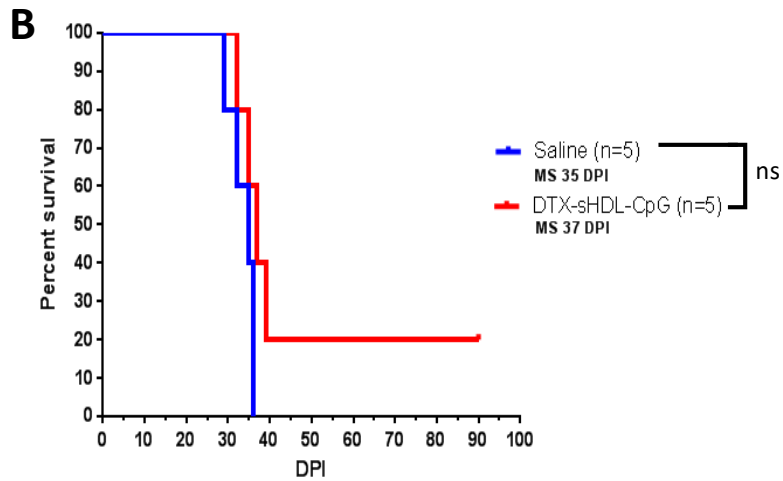

**Supplemental Figure 2: Intratumoral DTX-sHDL-CpG treatment for CD8 knockout mice.**

(A) CD8 knockout mice were implanted with GL26-wt tumors into the right striatum and they were treated intratumorally with saline or 0.5mg/Kg-DTX-sHDL-CpG nanodiscs on 8, 11, 15, 18, 22 and 25 days post tumor implantation. (F) Kaplan-Meier survival analysis of saline (n=5) or DTX-sHDL-CpG (n=5) treated CD8 knockout mice. Data were analyzed using the log-rank (Mantel-Cox) test (MS= median survival; ns= non-significant).

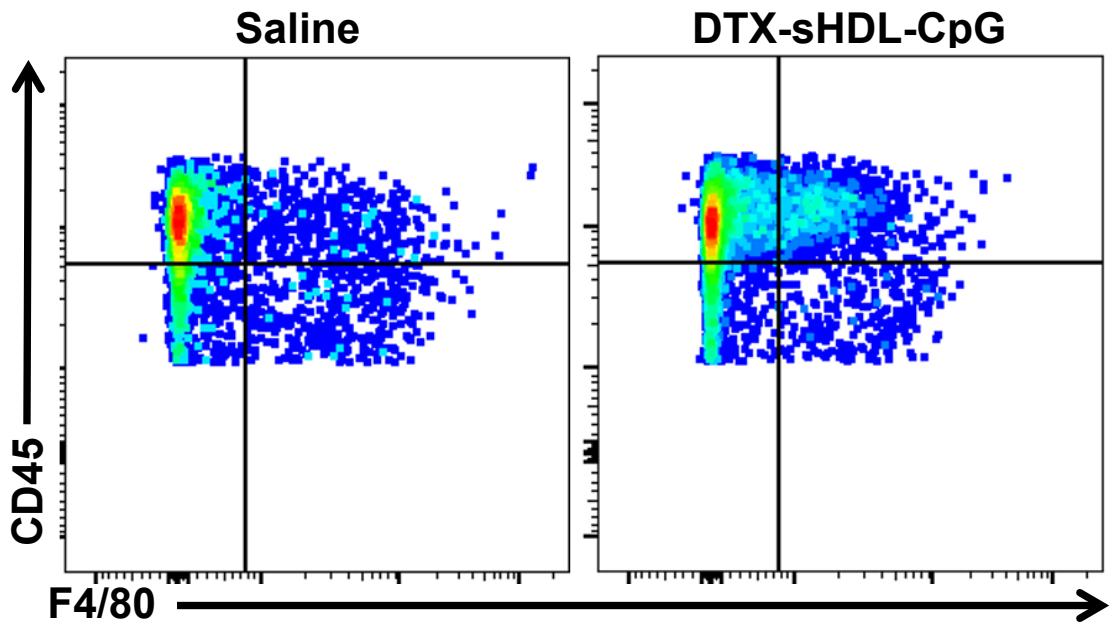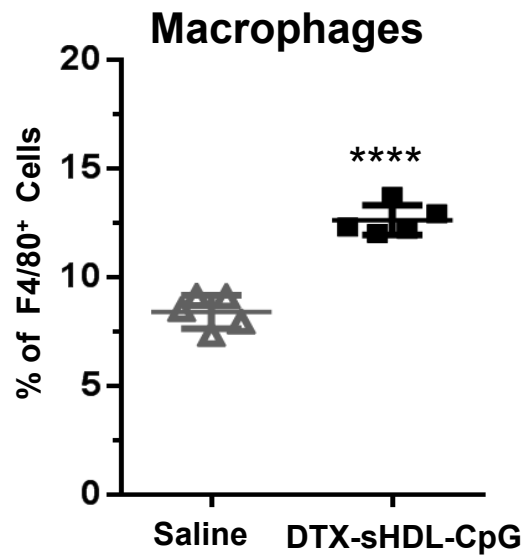

**Supplemental figure 3: Chemo-immunotherapy enhances macrophage responses within GBM TME.** The percent of macrophages (CD45<sup>+</sup>/F4/80<sup>+</sup>) within the TME of GL26-OVA tumor bearing mice were compared between saline and sHDL-CpG-DTX treatment groups at 26 days post tumor implantation. Representative flow plots for each group are displayed. \*\*\*\*p < 0.0001; unpaired t-test. Bars represent mean  $\pm$  SEM (n=5 biological replicates).

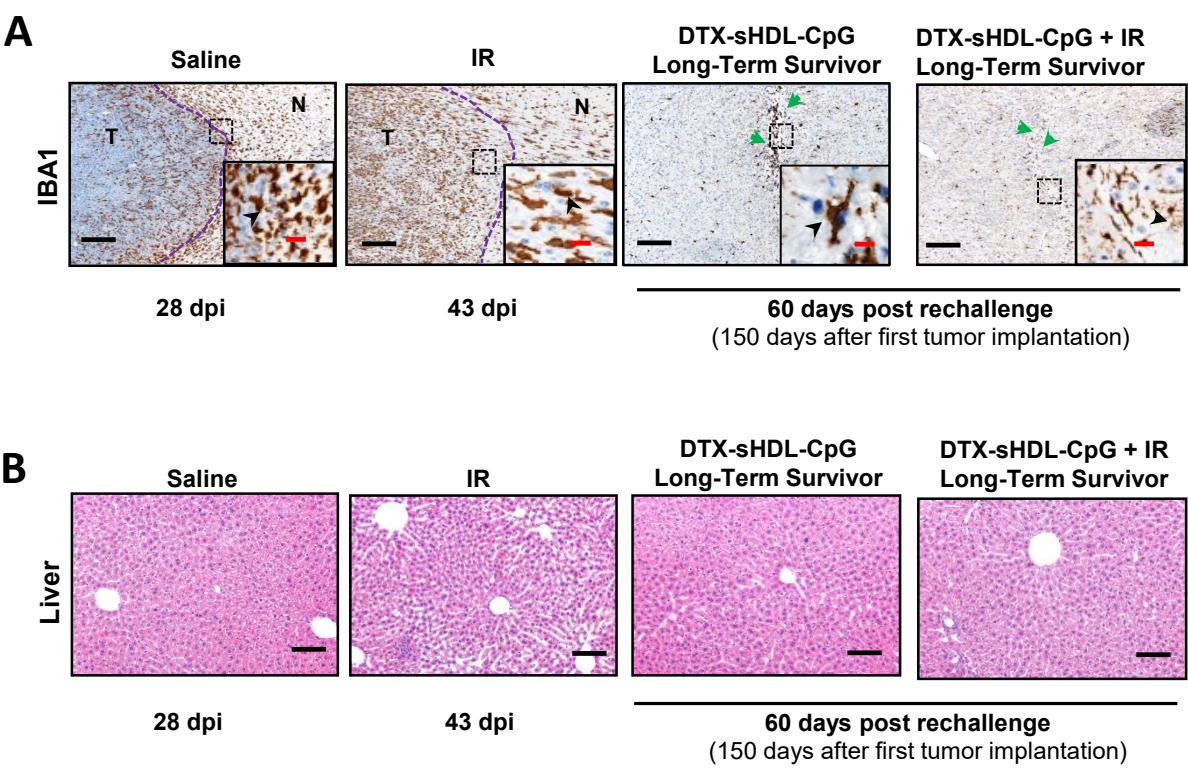

**Supplemental figure 4: Histopathological assessment of brains and livers from mice treated with chemo-immunotherapy. (A)** Paraffin embedded 5µm brain sections from saline (28 dpi), IR (43 dpi), and long term survivors from DTX-sHDL-CpG and DTX-sHDL-CpG + IR treatment groups (60dpi after rechallenge with GL26 cells). Paraffin embedded 5µm brain sections from each treatment group were stained for IBA1. Low magnification panels show normal brain (N) and tumor (T) tissue (black scale bar = 100 µm). Green arrows in the low magnifications panels indicate scar tissue. Black arrows in the high magnification panels (red scale bar = 20 µm) indicate positive staining for the areas delineated in the low magnification panels. **(B)** H&E staining of 5µm paraffin embedded liver sections from saline (28 dpi), IR (43 dpi), and long term survivors from DTX-sHDL-CpG and DTX-sHDL-CpG + IR treatment groups (60dpi after tumor rechallenged with GL26 cells) (black scale bar =200µm).
